# Supplementary material for: T cell activation and deficits in T regulatory cells are associated with major depressive disorder and severity of depression
Source: PubMed Central journal article supplement (PMC11096341; doi:10.1038/s41598-024-61865-y), 2024-05-16
Supplement: 41598_2024_61865_MOESM2_ESM.pdf [file 41598_2024_61865_MOESM2_ESM.pdf]

## **ELECTRONIC SUPPLEMENTARY FILE 2 (ESF2)**

### **T cell activation and deficits in T regulatory cells are associated with major depressive disorder and severity of depression**

(1) Muanpetch Rachayon; (1,2) Ketsupar Jirakran; (3) Pimpayao Sodsai; (1) Atapol Sughondhabirom, (1,4-7) Michael Maes.

(1) Department of Psychiatry, Faculty of Medicine, Chulalongkorn University and King Chulalongkorn Memorial Hospital, the Thai Red Cross Society, Bangkok, Thailand

(2) Center of Excellence for Maximizing Children's Developmental Potential, Department of Pediatrics, Faculty of Medicine, Chulalongkorn University, Bangkok, Thailand

(3) Center of Excellence in Immunology and Immune-Mediated Diseases, Department of Immunology, Faculty of Medicine, Chulalongkorn University and King Chulalongkorn Memorial Hospital, Bangkok, Thailand

(4) Sichuan Provincial Center for Mental Health, Sichuan Provincial People's Hospital, School of Medicine, University of Electronic Science and Technology of China, Chengdu 610072, China

(5) Key Laboratory of Psychosomatic Medicine, Chinese Academy of Medical Sciences, Chengdu, 610072, China

(6) Kyung Hee University, 26 Kyunghedae-ro, Dongdaemun-gu, Seoul 02447, Korea

(7) Department of Psychiatry, Medical University of Plovdiv, Plovdiv, Bulgaria

(8) Research Institute, Medical University Plovdiv, Plovdiv, Bulgaria

**ESF2, Table 1.** The different CD and cell surface markers, as well as their key functions, measured in the present study.

| CD Marker                              | Alternative names and functions                                                                                                                            |
|----------------------------------------|------------------------------------------------------------------------------------------------------------------------------------------------------------|
| CD3+                                   | T3, pan T-cell marker                                                                                                                                      |
| CD4+                                   | T4, T-cell marker, T helper cell                                                                                                                           |
| CD8+                                   | Leu2, T-cell marker, T cytotoxic cell                                                                                                                      |
| CD69+                                  | Very early activation T-cell marker of especially tissue-resident immune cells (marker of tissue retention), involved in lymphocyte proliferation          |
| CD71+                                  | Transferrin receptor, early activation T cell marker, promotes T cell proliferation                                                                        |
| CD40L or CD154                         | CD40 ligand, expressed on activated T cells, member of the TNF family, binds to CD40 (on CD8+ T cells, macrophages, antigen presenting cells, and B cells) |
| CD3 + CD4 + CD69+                      | CD69+ co-expressing CD3 CD4 cells                                                                                                                          |
| CD3 + CD8 + CD69+                      | CD69+ co-expressing CD3 CD8 cells                                                                                                                          |
| CD3 + CD4 + CD71+                      | Proliferating CD3 + CD4+ cells                                                                                                                             |
| CD3 + CD8 + CD71+                      | Proliferating CD3 + CD8+ cells                                                                                                                             |
| CD3 + CD4 + CD40L+                     | Activated CD3 + CD4+ T cells                                                                                                                               |
| CD3 + CD8 + CD40L+                     | Activated CD3 + CD4+ T cells                                                                                                                               |
| CD25+FoxP3+CB1+ (gated from CD3+CD4)   | CB1 bearing T regulatory (Treg) cells                                                                                                                      |
| CD25+FoxP3+CD152+ (gated from CD3+CD4) | CTLA-4 or CD152 is expressed on Treg cells, immune checkpoint that negatively regulates the immune response, CD152 bearing Treg cells                      |

CD25+FOXP3+GARP+ (gated from CD3+CD4+)

Glycoprotein A repetitions predominant, TGF- $\beta$ 1 receptor, Treg activation marker, these Tregs release TGF- $\beta$ 1, promote immune tolerance

**ESF2, Table 2.** Cytokine and chemokines examined in the current study.

| <b>Protein abbreviations</b> | <b>Gene Symbol</b> | <b>Protein name</b>                                                                                          | <b>OOR samples (%)</b> |
|------------------------------|--------------------|--------------------------------------------------------------------------------------------------------------|------------------------|
| IL-1 $\beta$                 | IL1B               | Interleukin-1 $\beta$                                                                                        | 0                      |
| IL-1RA                       | IL1RN              | Interleukin-1 receptor antagonist                                                                            | 0                      |
| IL-2                         | IL2                | Interleukin-2                                                                                                | 0                      |
| IL-4                         | IL4                | Interleukin-4                                                                                                | 0                      |
| IL-6                         | IL6                | Interleukin-6                                                                                                | 0                      |
| CXCL8 / IL-8                 | CXCL8              | C-X-C motif chemokine ligand 8                                                                               | 0                      |
| IL-9                         | IL9                | Interleukin-9                                                                                                | 0                      |
| IL-12                        | IL12               | Interleukin-12                                                                                               | 1                      |
| IL-15                        | IL15               | Interleukin-15                                                                                               | 0                      |
| IL-17                        | IL17               | Interleukin-17                                                                                               | 0                      |
| CCL11                        | CCL11              | Eotaxin                                                                                                      | 0                      |
| G-CSF                        | CSF3               | Granulocyte Colony Stimulating Factor,<br>Colony Stimulating Factor 3                                        | 0                      |
| GM-CSF                       | CSF2               | Granulocyte-macrophage colony-stimulating<br>factor, Colony-stimulating factor 2                             | 0                      |
| IFN- $\gamma$                | IFNG               | Interferon- $\gamma$                                                                                         | 0                      |
| CXCL10 /IP-10                | CXCL10             | C-X-C motif chemokine ligand 8, Interferon<br>gamma-induced protein 10                                       | 0                      |
| CCL2 / MCP1                  | CCL2               | C-C Motif Chemokine Ligand 2                                                                                 | 0                      |
| CCL3 / MIP-1 $\alpha$        | CCL3               | Macrophage inflammatory protein-1 alpha,<br>C-C Motif Chemokine Ligand 3                                     | 0                      |
| CCL5 /RANTES                 | CCL5               | C-C Motif Chemokine Ligand 5, Regulated<br>Upon Activation, Normally T-Expressed,<br>And Presumably Secreted | 0                      |
| TNF- $\alpha$                | TNF                | Tumor Necrosis Factor-Alpha                                                                                  | 0                      |

OOR: out of range (lower than the sensitivity of the assay). The results indicate that all analytes were measurable in all participants.

**ESF2, Table 3.** Description of the immune profiles used in this study.

| <b>Immune Profile</b> | <b>Members</b>                                                                                                                 |
|-----------------------|--------------------------------------------------------------------------------------------------------------------------------|
| <b>M1 macrophage</b>  | IL-1 $\beta$ , sIL-1RA, IL-6, TNF- $\alpha$ , CXCL8, CCL3                                                                      |
| <b>T helper-1</b>     | IL-2, IFN- $\gamma$ , IL-12                                                                                                    |
| <b>IRS</b>            | IL-1 $\beta$ , IL-6, TNF- $\alpha$ , CXCL8, CCL3, IL-2, IFN- $\gamma$ , IL-12, IL-17, IL-15, G-CSF, GM-CSF, CXCL10, CCL5, CCL2 |
| <b>T cell growth</b>  | IL4, IL9, IL12, GM-CSF, IL-15                                                                                                  |
| <b>Neurotoxicity</b>  | IL-1 $\beta$ , IL-6, TNF- $\alpha$ , CXCL8, CCL3, IL-2, IFN- $\gamma$ , IL-12, IL-17, CXCL10, CCL11, CCL5, CCL2                |

IRS: immune-inflammatory response system

**ESF2, Table 4.** Measurements of the frequencies of T cell activation markers in baseline (UNSTIM) and stimulated (STIM) conditions in major depressive disorder (MDD) and controls (HC).

|     |         | <b>Estimates</b> |            |                              |         |
|-----|---------|------------------|------------|------------------------------|---------|
|     |         | Mean             | Std. Error | 95% Wald Confidence Interval |         |
| MDD | UN_STIM |                  |            | Lower                        | Upper   |
| HC  | UNSTIM  | 4.8226           | 1.59616    | 1.6942                       | 7.9510  |
|     | STIM    | 50.4121          | .96969     | 48.5115                      | 52.3126 |
| MDD | UNSTIM  | 6.2336           | 1.54829    | 3.1990                       | 9.2682  |
|     | STIM    | 52.5532          | 1.21500    | 50.1719                      | 54.9346 |

Results are shown as estimated marginal mean (in percentage) and SE.

**ESF2, Table 5.** Differences in unstimulated (UNST) and stimulated (STIM) changes of median immune fluorescence (MFI) of T lymphocytes in healthy controls (HC) and major depressed patients (MDD)

| MFI (z scores)    | Condition | Diagnosis                   |                             | Tests of Model effects |              |              |
|-------------------|-----------|-----------------------------|-----------------------------|------------------------|--------------|--------------|
|                   |           | HC <sup>a</sup><br>n=20     | MDD <sup>c</sup><br>n=28    | Effects                | Wald<br>df=1 | p            |
| CD3+CD69+         | UNST      | -0.665 (0.105)              | -0.785 (0.2)                | Group (G)              | 0.047        | 0.829        |
|                   | STIM      | 0.702 (0.06)                | 0.761 (0.063)               | Gxtime (T)             | 0.779        | 0.371        |
| <b>CD3+CD71+</b>  | UNST      | -1.109(0.12) <sup>c</sup>   | -0.791(0.088) <sup>a</sup>  | G                      | 4.222        | <b>0.040</b> |
|                   | STIM      | 0.895(0.037)                | 0.931(0.035)                | GXT                    | 4.024        | <b>0.045</b> |
| CD3+CD154+        | UNST      | -1.001 (0.098)              | -0.889 (0.068)              | G                      | 0.336        | 0.562        |
|                   | STIM      | 0.952 (0.049)               | 0.921 (0.06)                | GXT                    | 0.98         | 0.332        |
| CD3+HLADR+        | UNST      | -0.992 (0.131)              | -0.761 (0.131)              | G                      | 3.774        | 0.052        |
|                   | STIM      | 0.807 (0.07)                | 0.882 (0.049)               | GXT                    | 0.613        | 0.434        |
| CD4+CD69+         | UNST      | -0.843 (0.110)              | -0.886 (0.127)              | G                      | 0.266        | 0.606        |
|                   | STIM      | 0.776 (0.064)               | 0.929 (0.06)                | GXT                    | 1.469        | 0.225        |
| <b>CD4+CD71+</b>  | UNST      | -1.109 (0.116) <sup>c</sup> | -0.79 (0.085) <sup>a</sup>  | G                      | 3.88         | <b>0.049</b> |
|                   | STIM      | 0.928 (0.039)               | 0.908 (0.045)               | GXT                    | 6.144        | 0.013        |
| CD4+CD154+        | UNST      | -1.013 (0.095)              | -0.889 (0.063)              | G                      | 0.153        | 0.695        |
|                   | STIM      | 0.981 (0.05)                | 0.909 (0.058)               | GXT                    | 1.882        | 0.170        |
| <b>CD4+HLADR+</b> | UNST      | -1.13 (0.138) <sup>c</sup>  | -0.633 (0.119) <sup>a</sup> | G                      | 8.42         | <b>0.004</b> |
|                   | STIM      | 0.754 (0.078)               | 0.879 (0.077)               | GXT                    | 3.973        | <b>0.046</b> |

|                        |      |                |                |     |       |       |
|------------------------|------|----------------|----------------|-----|-------|-------|
| CD8+CD69+              | UNST | -0.71 (0.293)  | -0.56 (0.143)  | G   | 0.027 | 0.870 |
|                        | STIM | 0.667 (0.086)  | 0.587 (0.092)  | GXT | 0.861 | 0.353 |
| CD8+CD71+              | UNST | -0.955 (0.093) | -0.928 (0.064) | G   | 0.807 | 0.369 |
|                        | STIM | 0.867 (0.065)  | 0.986 (0.05)   | GXT | 0.648 | 0.421 |
| CD8+CD154+             | UNST | -0.907 (0.099) | -0.94 (0.068)  | G   | 1.017 | 0.313 |
|                        | STIM | 0.82 (0.057)   | 0.997 (0.066)  | GXT | 1.874 | 0.171 |
| CD8+HLADR+             | UNST | -0.919(0.128)  | -0.855(0.116)  | G   | 0.148 | 0.700 |
|                        | STIM | 0.873(0.062)   | 0.886(0.048)   | GXT | 0.081 | 0.766 |
| CD25+ FOXP3+CB1+       | UNST | -0.025 (0.160) | -0.376 (0.108) | G   | 1.047 | 0.306 |
|                        | STIM | 0.343 (0.29)   | 0.168 (0.214)  | GXT | 0.452 | 0.501 |
| CD25+<br>FOXP3+CD152+  | UNST | -0.43 (0.235)  | -0.817 (0.171) | G   | 1.865 | 0.172 |
|                        | STIM | 0.728 (0.095)  | 0.622 (0.059)  | GXT | 1.229 | 0.268 |
| CD25+<br>FOXP3+GARP+ % | UNST | -0.717(0.279)  | -0.742(0.112)  | G   | 0.052 | 0.820 |
|                        | STIM | 0.669(0.074)   | 0.773(0.057)   | GXT | 0.218 | 0.640 |

**ESF2, Table 6.** Measurements of the median fluorescence intensity of T regulatory cells in baseline (UNST) and stimulated (STIM) conditions in major depressive disorder (MDD) and healthy controls (HC).

| Group | UNST_STIM | Estimates |            | 95% Wald Confidence Interval |           |
|-------|-----------|-----------|------------|------------------------------|-----------|
|       |           | Mean      | Std. Error | Lower                        | Upper     |
| HC    | UNST      | -.1969023 | .09951962  | -.3919572                    | -.0018475 |
|       | STIM      | .3848233  | .16977562  | .0520692                     | .7175774  |
| MDD   | UNST      | -.4500016 | .05696057  | -.5616423                    | -.3383610 |
|       | STIM      | .3268810  | .10627718  | .1185816                     | .5351805  |

Results are shown as estimated marginal mean (in percentage) and SE.

**ESF, Table 7.** Differences in unstimulated (UNST) and lipopolysaccharide + phytohaemagglutinin-stimulated (STIM) changes in various immune profiles in healthy controls (HC) and major depressed patients (MDD).

| <b>Variables</b>  |      | <b>HC</b>      | <b>MDD</b>     | <b>p</b> |
|-------------------|------|----------------|----------------|----------|
| <b>(z scores)</b> |      | <b>n=20</b>    | <b>n=30</b>    |          |
| M1                | UNST | -0.878 (0.061) | -0.851 (0.045) | 0.004    |
|                   | STIM | 0.607 (0.040)  | 1.032 (0.143)  |          |
| Th-1              | UNST | -1.385 (0.074) | -1.514 (0.051) | 0.063    |
|                   | STIM | 0.222 (0.085)  | 0.547 (0.152)  |          |
| IRS               | UNST | -1.522 (0.096) | -1.528 (0.073) | 0.002    |
|                   | STIM | 0.123 (0.050)  | 0.615 (0.050)  |          |
| T cell growth     | UNST | -1.471 (0.092) | -1.439 (0.097) | 0.003    |
|                   | STIM | 0.033 (0.048)  | 0.541 (0.164)  |          |
| Neurotoxicity     | UNST | -1.615 (0.102) | -1.685 (0.064) | 0.018    |
|                   | STIM | 0.266 (0.065)  | 0.598 (0.125)  |          |

Results of GEE analyses with the 5 immune profiles as dependent variables and time (unstimulated versus stimulated), group (depression versus controls) and time by group interactions as explanatory variables. All results are shown as estimated marginal means (SE). Age, sex, body mass index, and tobacco use were not significant in these analyses. All the interaction patterns were significant ( $p < 0.01$ ), and all stimulated immune profiles were significantly higher than the unstimulated profiles ( $p < 0.001$ ). Pairwise comparisons show no significant differences in the unstimulated immune profiles between MDD and controls. The p values in this table indicate the pairwise comparisons of the stimulated profiles between MDD and controls. For immune profiles, see ESF, Table 2 and 3 for explanation.
